# Supplementary material for: Selective packaging of viroid RNAs into plant exosomes, mediated by host proteins, enables efficient cross-kingdom transmission
Source: Research Square preprint supplement (doi:10.21203/rs.3.rs-7544331/v1), 2025-10-08
Supplement: Supplementary file 1 [file 79797bc7140f6b1ff3a1a6e0.docx]

**Supporting data**

**Exosomal viroid RNA and its association with PP2 and TET8 suggest a role in transmission**

Neha Devi1, Nisha Devi1, Vasudha Sharma1, Ravi Gupta2, Sunny Dhir1*, Yashika Walia1*

1Molecular Plant Virology Group, R&D Lab, Department of Bio-Sciences & Technology, Maharishi Markandeshwar (Deemed to be University), Mullana, Ambala-133207 HR India

2Plant Stress Physiology and Proteomics Laboratory, College of General Education, Kookmin University, Seoul, South Korea

Neha Devi: [nehadevi611999@gmail.com](mailto:nehadevi611999@gmail.com)

Vasudha Sharma: [vasu.3096sharma@gmail.com](mailto:vasu.3096sharma@gmail.com)

Nisha Devi: [nishapahal99@gmail.com](mailto:nishapahal99@gmail.com)

Ravi Gupta: ravigupta@kookmin.ac.kr

*Corresponding Authors

Dr. Yashika Walia; [yashikawalia@gmail.com](mailto:yashikawalia@gmail.com), [yashika.dhir@mmumullana.org](mailto:yashika.dhir@mmumullana.org)

ORCID ID: 0000-0002-0796-0050

Dr. Sunny Dhir; [sunny72155@gmail.com](mailto:sunny72155@gmail.com), [sunny.dhir@mmumullana.org](mailto:sunny.dhir@mmumullana.org)

ORCID ID: 0000-0002-3790-8333

**Supplementary Figures**

**Fig. S1a** showing the procedure followed for isolation of AWF from cucumber leaves

**Fig. S1b** showing the procedure followed for isolation of EVs from isolated AWF of cucumber

**Fig. S1c and S1d** Standardization of trypsin and RNase concentration for treatment of EVs with trypsin and RNase for protease protection assay.

**Fig. S1e** Showing labeling of minus strand of ASSVd transcript with Biotin at its 3’ end and its detection using anti anti-Streptavidin antibody.

**Fig. S2a** Sequence Homology between CsTET8 and AtTET8 showing 65.67% identity between the two proteins. The EC2 domain froM which the antibody of Phytoab AtTET8 is made is marked in red boxes

**Fig. S2b:** Multiple alignment between EC2 domain of CsTET8 and AtTET8 showing consensus sequences between the two proteins

**Fig. S2c** a and b: western blot of *N. benthamiana* cell lysate (CL) and AWF showing transient expression of CsTET8-pSITE2CA in and empty vector (pSITE2CA) with 25kDa band corresponding to the size of only GFP and app. 55kDa size of CsTET8+GFP detected with (a) anti-GFP antibody. (b) AtTE8 antibody. The band corresponding to the size of CsTET8+GFP is detected in AWF and marked in box. The arabidopsis TET8 band detected with AtTET8 antibody at 30kDa as positive control is marked in green box

**Fig. S2d** western blot of *N. benthamiana* cell lysate (CL) showing transient expression of HA-CsTET8 and arabidopsis and cucumber cell lysate as control showing 30kDa band corresponding to the size of TET8 with anti-TET8 antibody and anti-HA antibody.

**Fig. S2e** Image showing EVs from GFP-CsPP2 expressing *N. benthamiana* and mock plants as visualized under fluorescence microscope using GFP Filter

**Fig. S2f** Showing the presence of transmemberane domain in the CsPP2 as analyzed using DeepLoC 2.1 tool ([DeepLoc 2.1 - DTU Health Tech - Bioinformatic Services](https://services.healthtech.dtu.dk/services/DeepLoc-2.1/))

**Fig. S3a** EXOmotifs observed in various viroids

**Fig. S3b** Overview of various EXOmotifs identified in animal studies from extracellular RNA and the motifs found within the ASSVd genome.

**Fig. S3c** The location of the identified EXOmotifs in the secondary structure of ASSVd is highlighted by colored boxes.

**Confirming cross reactivity of AtTET8 antibody to CsTET8 protein**

We tested whether Arabidopsis TET8 (AtTET8) antibodies would cross-react with cucumber Tet8 (CsTet8) protein and found that the Arabidopsis Tet8 (AT2G23810) ortholog in cucumber is Tet8/Lipoxygenase domain 3 (Csa1g287020) that shared 65.67% homology with AtTet8 (Fig. S2a). Additionally, the 18 amino acids used to generate the peptide from the EC2 domain (Phytoab) were over 90% identical between the Arabidopsis and cucumber Tet8, suggesting that AtTet8 antibodies would cross-react with cucumber Tet8 (Fig. S2b).

To further confirm this cross-reactivity, we cloned CsTET8 (Csa_1g287020), the cucumber ortholog of AtTET8, into the pSITE2CA and HApBA plant binary vector with a GFP tag for visualization. These recombinant plasmid and were then transiently expressed in Nicotiana plants, and western blot analysis using anti-GFP, anti-TET8 and anti-AtTET8 antibodies confirmed that the AtTET8 antibodies effectively recognized CsTET8 (Fig. S2c, S2d) at size of approximately 55kDa and 25kDa, respectively. Based on these findings, we proceeded to use the available AtTET8 antibodies in further experiments.

**Generation of constructs**

The CsTET8 gene (Csa1g287020) was amplified from cucumber plants using the RT-PCR method. In brief, RNA was extracted from healthy cucumber plants with RNAiso Plus. Reverse transcription was performed with the Verso cDNA synthesis kit (Thermo). PCR amplification was carried out using Phusion DNA polymerase (Thermo) with specific primers (CsTET8F/R) (Table S1). The PCR products were resolved on a 1.5% agarose gel, and the desired bands were excised and purified using the GeneJET Thermo kit. The purified fragments were then cloned into the pJET1.2 vector (Thermo) and transformed into TOP10 competent cells. The recombinant plasmid was sequenced, confirming 100% identity to CsTET8.

The CsTET8 gene was further amplified using adaptor primers (CsTET8att F and CsTET8att R) and universal primers (Adaptor F/R) (Table S1). The amplified fragment was ligated into the PDONR207 vector using BP clonase (Invitrogen) and transformed into TOP10 competent cells. The transformed cells were plated on LA plates containing 100 mg/ml kanamycin. Recombinant plasmids were verified through colony PCR using the vector-specific primer (Nru R) and the gene-specific primer (CsTET8 F).

Subsequently, the pDONR-CsTET8 clone was sub cloned into the pSITE2CA vector and the HA-pBA vector (Chakrabarty et al., 2007) for expression under the CaMV35S promoter, with N-terminal GFP and HA tags, respectively, using the LR clonase enzyme (Thermo Scientific, USA). The ligated products were transformed into LA plates containing 50 mg/ml spectinomycin. Recombinant clones were screened by colony PCR with the CaMV35S forward primer and CsTET8R primer. The GFP-TET8 and HA-TET8 constructs were then transformed into the Agrobacteriun strain GV3101 using chemical transformation and used for transient expression analysis in *Nicotiana benthamiana* plants, as described by Walia et al. (2020).

The sub cellular localization of CsTET8 was monitored by transiently expressing the CsTET8-pSITE2CA in *N. benthamiana* which revealed the cytoplasmic and plasma membranous localization of CsTET8.
