# Supplementary material for: Selective packaging of viroid RNAs into plant exosomes, mediated by host proteins, enables efficient cross-kingdom transmission
Source: Research Square preprint supplement (doi:10.21203/rs.3.rs-7544331/v1), 2025-10-08
Supplement: Supplementary file 2 [file e1adecc1809e15af17eef158.docx]

| Primer name | Sequence |
| --- | --- |
| ASSVdICC | GTCGACGAAGGCCGGTGAGAA |
| ASSVd ICH | GTCGACGACGACAGGTGAGTT |
| CsTET8 f | ATGGTCAAACTCAGCAATAATCTC |
| CsTET8 r | TCATTTCCATCTAGGATAATG |
| CsTET8 att F | AAAAAGCAGGCTCAATGGTCAAACTCAGCAATAATC |
| SCsTET8 att R | AGAAAGCTGGGTATCATTTCCATCTAGGATAATG |
| Adaptor F | GGG GAC AAG TTT GTA CAA AAA AGC AGG CT |
| Adaptor R | GGG GAC CAC TTT GTA CAA GAA AGC TGG GT |
| CaMV35S | GACTCACTATAGGGAGAG |
| Nru R | ACGGAAACAGCTATGAC |
| CsPP2-HIS F BamH1 | GAGGATCCATGGTTTGCATAGAGACAGAA |
| CsPP2-HIS R Xho1 | GACTCGAGTTTAGCATCCGCAACTGGATT |
| CsPP2 att F | AAAAAGCAGGCTCAAATGGTTTGCATAGAGACAGAA |
| CsPP2 att R | AGAAAGCTGGGTATAAAAAGCAGGCTCAA |
| FP1 | AGTAATACGACTCACTATAGGGGGGAAACACCTATTGTGTT |
| RP4 | GGTAAACACCGTGCGGTTC |

**Table S1:** Primers used during the study
